# Supplementary material for: Elucidating photoreceptor gene function with in-vivo CRISPR knock-out perturbation assay
Source: Research Square preprint supplement (doi:10.21203/rs.3.rs-7670521/v1), 2025-10-27
Supplement: Supplementary file 1 [file de32c444911fd3c9b10f094d.xlsx]

## Sheet: Supplemental Table 1
Gene_gRNA	gRNA sequence	Description
Amfr__sgRNA1	GAAAGTCGGTGTAATACACAT	ER protein processing pathway
Amfr__sgRNA2	GCTTGTTCTAGCCAAGAACGA	ER protein processing pathway
Amfr__sgRNA3	GTGATTGTGCTGGTTCAAGCG	ER protein processing pathway
Amfr__sgRNA4	GTGTCTTTCACTCACTCGAAG	ER protein processing pathway
Amfr__sgRNA5	GACACAAGAATTATTTGCGAG	ER protein processing pathway
Amfr__sgRNA6	GCCACTCCAATGAGCAGCCAT	ER protein processing pathway
Atf4__sgRNA1	GATCACATGTGTCATCCAACG	ER protein processing pathway
Atf4__sgRNA2	GCAAACCCGACTGGTCGAAGG	ER protein processing pathway
Atf4__sgRNA3	GAGGCTGCAAGAATGTAAAGG	ER protein processing pathway
Atf4__sgRNA4	GTCCCGGAAAAGGCATCCTCT	ER protein processing pathway
Atf4__sgRNA5	GAATCCCTCCATGTGTAAAGG	ER protein processing pathway
Atf4__sgRNA6	GACTGCCTAGCTCTAAACTAA	ER protein processing pathway
Bag1__sgRNA1	GCCAAACCGAGGAAGTAACTG	ER protein processing pathway
Bag1__sgRNA2	GCCCGGGACTCCGACTGGCG	ER protein processing pathway
Bag1__sgRNA3	GTTCTCGCTCTGAGAAGAGCG	ER protein processing pathway
Bag1__sgRNA4	GGGCATGACCGATCCACCAG	ER protein processing pathway
Bag1__sgRNA5	GTGACGATCACGCTGAGTCT	ER protein processing pathway
Bag1__sgRNA6	GCCCGTAGCAAGAACGTGACC	ER protein processing pathway
Bax__sgRNA1	GGACACGGACTCCCCCCGAG	ER protein processing pathway
Bax__sgRNA2	GTTTCATCCAGGATCGAGCA	ER protein processing pathway
Bax__sgRNA3	GTTCTTGGTGGACGCATCCTG	ER protein processing pathway
Bax__sgRNA4	GCCAGTTCATCTCCAATTCGC	ER protein processing pathway
Bax__sgRNA5	GCTGATGGCAACTTCAACTG	ER protein processing pathway
Bax__sgRNA6	GTGCTAGCAAACTGGTGCTCA	ER protein processing pathway
Bcap31__sgRNA1	GCAGCAAAGACCTCTGCGTAG	ER protein processing pathway
Bcap31__sgRNA2	GTACTCACAAGGACAGCAGCA	ER protein processing pathway
Bcap31__sgRNA3	GTGGAGTTGGTAGTGACCTA	ER protein processing pathway
Bcap31__sgRNA4	GTGGCACCTGGATTGTTCTGG	ER protein processing pathway
Bcap31__sgRNA5	GTGAGGCGGCCAAGAAATACA	ER protein processing pathway
Bcap31__sgRNA6	GCACCAATAACCAACAGTACA	ER protein processing pathway
Calr__sgRNA1	GTGAGCAGAATATCGACTGTG	ER protein processing pathway
Calr__sgRNA2	GTATGTTTGGATTCGACCCAG	ER protein processing pathway
Calr__sgRNA3	GCAAGAATGTGCTGATCAACA	ER protein processing pathway
Calr__sgRNA4	GCGGCCAGACAACACCTATG	ER protein processing pathway
Calr__sgRNA5	GTACATAGGTCCGGACATCTG	ER protein processing pathway
Calr__sgRNA6	GCCACGTGTACTCCTAGGACT	ER protein processing pathway
Canx__sgRNA1	GTCACGTGAAGGGTTTACAGG	ER protein processing pathway
Canx__sgRNA2	GATGTTTGGTCCAGATAAGTG	ER protein processing pathway
Canx__sgRNA3	GAAGGAAACAAAGCTTCCAG	ER protein processing pathway
Canx__sgRNA4	GCAGGGGCTGACTCACACTTG	ER protein processing pathway
Canx__sgRNA5	GCAAAGCTCCAGTTCCAACAG	ER protein processing pathway
Canx__sgRNA6	GTTCATCTGGGATCTTAGAAG	ER protein processing pathway
Cul1__sgRNA1	GTCGCTTCATAAACAACAATG	ER protein processing pathway
Cul1__sgRNA2	GCACACAAGATGAACTAGCA	ER protein processing pathway
Cul1__sgRNA3	GAAGTTCTACACTCAGCAGT	ER protein processing pathway
Cul1__sgRNA4	GATCAATACAAGACTGATTAG	ER protein processing pathway
Cul1__sgRNA5	GAGACACATATTCATAATCA	ER protein processing pathway
Cul1__sgRNA6	GAACACCTTACCACTTGATTG	ER protein processing pathway
Cryab__sgRNA1	GAGTCCGGTGTCAATCCAGCT	ER protein processing pathway
Cryab__sgRNA2	GCTCCGAAGAACTGGTCGAAG	ER protein processing pathway
Cryab__sgRNA3	GCTCTTGGATTAGGACGAACA	ER protein processing pathway
Cryab__sgRNA4	GGGGACGTGATTGAGGTCCA	ER protein processing pathway
Cryab__sgRNA5	GAAGAAGGGGCGCCGGATCCA	ER protein processing pathway
Cryab__sgRNA6	GCGTGAAGCACTTCTCTCCGG	ER protein processing pathway
Dnaja2__sgRNA1	GCTTACCTTCTCCATTACAGT	ER protein processing pathway
Dnaja2__sgRNA2	GAAGGCATGAAACATGGACAG	ER protein processing pathway
Dnaja2__sgRNA3	GCAGAAATGCAGCGCTTGTCG	ER protein processing pathway
Dnaja2__sgRNA4	GAATCAGAGTAGAAGTCGAAA	ER protein processing pathway
Dnaja2__sgRNA5	GCGAGAGCTGTATGACAGATA	ER protein processing pathway
Dnaja2__sgRNA6	GTGGTTGTCTTGCCATTGTAC	ER protein processing pathway
Dnajb11__sgRNA1	GCAAACGGAAATGCAACTGT	ER protein processing pathway
Dnajb11__sgRNA2	GTGGCCATCAGAGCTCTCATG	ER protein processing pathway
Dnajb11__sgRNA3	GAGATTTCTATAAGATCTTGG	ER protein processing pathway
Dnajb11__sgRNA4	GAGTACCCCTTTATTGGAGA	ER protein processing pathway
Dnajb11__sgRNA5	GACTCTGGAAGAAGTGTACGC	ER protein processing pathway
Dnajb11__sgRNA6	GCATCAGGGTTCCGGTCAGGG	ER protein processing pathway
Dnajb12__sgRNA1	GTCTGGCAACTCACATCACCC	ER protein processing pathway
Dnajb12__sgRNA2	GCTGGCTGTGGACTTACTGGA	ER protein processing pathway
Dnajb12__sgRNA3	GAGACAAGAACCATGCGCCTG	ER protein processing pathway
Dnajb12__sgRNA4	GTACCCGACGCCACGAGTCAG	ER protein processing pathway
Dnajb12__sgRNA5	GAGCCACGGGGACTTCCACCG	ER protein processing pathway
Dnajb12__sgRNA6	GCATACCACCACCAAGAAGGC	ER protein processing pathway
Dnajc5__sgRNA1	GATGACAAGTATGGCTCGCTG	ER protein processing pathway
Dnajc5__sgRNA2	GTAACACGGCTGCTTACCGAT	ER protein processing pathway
Dnajc5__sgRNA3	GCCAGCTGGAGAGTACGAAGT	ER protein processing pathway
Dnajc5__sgRNA4	GCAAGAACCCTGATAACCCAG	ER protein processing pathway
Dnajc5__sgRNA5	GAACATGGTATAATGATTCCC	ER protein processing pathway
Dnajc5__sgRNA6	GTTTCGTGGCGTCTGTCAGGA	ER protein processing pathway
Eif2s1__sgRNA1	GAGAGGAAGCAATCAAATGTG	ER protein processing pathway
Eif2s1__sgRNA2	GTGCATGCTTAAAAGCATCGT	ER protein processing pathway
Eif2s1__sgRNA3	GCAAGCGGTCAAAATTCGAGC	ER protein processing pathway
Eif2s1__sgRNA4	GTGAGGTATTAGAATATACCA	ER protein processing pathway
Eif2s1__sgRNA5	GAAGATCCATTGCTGAAATGG	ER protein processing pathway
Eif2s1__sgRNA6	GTATAGAACGGATACGTCGTC	ER protein processing pathway
Herpud1__sgRNA1	GCCGGAGCCAATCAGAACTTG	ER protein processing pathway
Herpud1__sgRNA2	GCTGGCTACACAACGTATGGG	ER protein processing pathway
Herpud1__sgRNA3	GTGTGTCTGATTAGAGTTGTC	ER protein processing pathway
Herpud1__sgRNA4	GGCGACTCACACTCCAACTG	ER protein processing pathway
Herpud1__sgRNA5	GAAGTGCACAAGAGATACCTG	ER protein processing pathway
Herpud1__sgRNA6	GAGATGTTCTCCCATCCGGA	ER protein processing pathway
Hsp90aa1__sgRNA1	GCTTCAGCTTGGAATTCACG	ER protein processing pathway
Hsp90aa1__sgRNA2	GTACCCCTCTAATGAAATCTG	ER protein processing pathway
Hsp90aa1__sgRNA3	GAATCCGTTACGAGAGCCTGA	ER protein processing pathway
Hsp90aa1__sgRNA4	GAGACCAAACAGAGTATTTGG	ER protein processing pathway
Hsp90aa1__sgRNA5	GCGACGATGAGCAGTATGCCT	ER protein processing pathway
Hsp90aa1__sgRNA6	GCCGACTTGATCAATAACCT	ER protein processing pathway
Hsp90ab1__sgRNA1	GAAGCATTAGAGATCAACTCG	ER protein processing pathway
Hsp90ab1__sgRNA2	GAGTACCTCAACTTTATCCG	ER protein processing pathway
Hsp90ab1__sgRNA3	GTGAAGATGTGGGATCCGATG	ER protein processing pathway
Hsp90ab1__sgRNA4	GAGACACATACTCTGACAAGG	ER protein processing pathway
Hsp90ab1__sgRNA5	GCTGACCTCATTAATAACCT	ER protein processing pathway
Hsp90ab1__sgRNA6	GATACTCACATAGAGGGTGAT	ER protein processing pathway
Hsp90b1__sgRNA1	GAAGACCACTCAAATCGAACA	ER protein processing pathway
Hsp90b1__sgRNA2	GCATCTACGTGTGGAGTAGCA	ER protein processing pathway
Hsp90b1__sgRNA3	GTCTCACGGGAAACATTGAG	ER protein processing pathway
Hsp90b1__sgRNA4	GTATTCATCAAACAGACCTCG	ER protein processing pathway
Hsp90b1__sgRNA5	GAGAGGAAACACACTAGGTCG	ER protein processing pathway
Hsp90b1__sgRNA6	GGGTGTAGGAATGACTAGAG	ER protein processing pathway
Hspa4l__sgRNA1	GTATCCATGGAATCTTCAGTG	ER protein processing pathway
Hspa4l__sgRNA2	GAATGTTGTGTTTATCGACAT	ER protein processing pathway
Hspa4l__sgRNA3	GCTCCTGATACAGCCGCAACA	ER protein processing pathway
Hspa4l__sgRNA4	GGTCATAACTTTCCACAAGA	ER protein processing pathway
Hspa4l__sgRNA5	GAGCTTCATCAGCATTCAGGG	ER protein processing pathway
Hspa4l__sgRNA6	GTTGCAATTGAGCAAGTCACT	ER protein processing pathway
Hspa5__sgRNA1	GTGTGTTCAAGAACGGCCGCG	ER protein processing pathway
Hspa5__sgRNA2	GGTGAGAAGAGACACATCGA	ER protein processing pathway
Hspa5__sgRNA3	GCATTCCAAGTGCGTCCGATG	ER protein processing pathway
Hspa5__sgRNA4	GTTGCTGGACTGAATGTCATG	ER protein processing pathway
Hspa5__sgRNA5	GTGTGCAGAAACTCCGGCGTG	ER protein processing pathway
Hspa5__sgRNA6	GCATGGTTCTCACTAAAATGA	ER protein processing pathway
Hspa8__sgRNA1	GTTAGACCGTTACCAACGCTG	ER protein processing pathway
Hspa8__sgRNA2	GAAAGCAACATAGCTTGGCG	ER protein processing pathway
Hspa8__sgRNA3	GTGGTGGTATTGCGCTTGATG	ER protein processing pathway
Hspa8__sgRNA4	GCTACAGGGTCCAGTGTGCCA	ER protein processing pathway
Hspa8__sgRNA5	GTTTGACAGGTCGGAGCTGAA	ER protein processing pathway
Hspa8__sgRNA6	GTATGTATTTACCTGCACCAT	ER protein processing pathway
Hyou1__sgRNA1	GTGGAATTGATATCTTTCCGG	ER protein processing pathway
Hyou1__sgRNA2	GACAGGCGGATAACCCTCATG	ER protein processing pathway
Hyou1__sgRNA3	GCAAGGCCAAAGTAACTCGGG	ER protein processing pathway
Hyou1__sgRNA4	GTCCGTATTTGAGACCCTGG	ER protein processing pathway
Hyou1__sgRNA5	GTAGGTGGAGTTCACAAGGG	ER protein processing pathway
Hyou1__sgRNA6	GAACAGATTTGACCGCACCC	ER protein processing pathway
Lman1__sgRNA1	GTGTATTTGTACTCGAAACGG	ER protein processing pathway
Lman1__sgRNA2	GTGTTTGGATCAGCTGATACG	ER protein processing pathway
Lman1__sgRNA3	GACAACTCGCTAAAGCTTGAG	ER protein processing pathway
Lman1__sgRNA4	GAACATGGTTATCCCCACACA	ER protein processing pathway
Lman1__sgRNA5	GAAAGCCAAAGAGGTTCCGTG	ER protein processing pathway
Lman1__sgRNA6	GCCATTATTGATCATGACCT	ER protein processing pathway
Mapk9__sgRNA1	GATAGTATCGAGTTACCACAT	ER protein processing pathway
Mapk9__sgRNA2	GTACCAGCAACTGAAACCGAT	ER protein processing pathway
Mapk9__sgRNA3	GAAAACAGACCAAAGTACCC	ER protein processing pathway
Mapk9__sgRNA4	GAAGGTAGGACATTCTCTCA	ER protein processing pathway
Mapk9__sgRNA5	GTAAGAGGACGAGTTCACGGT	ER protein processing pathway
Mapk9__sgRNA6	GAATCCTTAGATATTGATCAA	ER protein processing pathway
Nploc4__sgRNA1	GTCTACAGAAATACCGACACG	ER protein processing pathway
Nploc4__sgRNA2	GAGGGTACAGTCCGATACAGT	ER protein processing pathway
Nploc4__sgRNA3	GAAAGGCCTTTAACCCTACCG	ER protein processing pathway
Nploc4__sgRNA4	GACTCTGCACTCACGCACCTG	ER protein processing pathway
Nploc4__sgRNA5	GGGCAACAAACTTACCCCTG	ER protein processing pathway
Nploc4__sgRNA6	GCTTGGATCCAAAATGACCAT	ER protein processing pathway
Os9__sgRNA1	GAGGACACAGACCGCCAAGTG	ER protein processing pathway
Os9__sgRNA2	GCCAGAGCCAAGCTTCAGACG	ER protein processing pathway
Os9__sgRNA3	GTACTGACCATTCGCACGTCA	ER protein processing pathway
Os9__sgRNA4	GACATTTGGACCCGTTGCCGT	ER protein processing pathway
Os9__sgRNA5	GGGGTTGACTGACCATTGGG	ER protein processing pathway
Os9__sgRNA6	GATCCAGCAGTACCATATGGA	ER protein processing pathway
P4hb__sgRNA1	GTAGGGTAATAAGCCGCACAG	ER protein processing pathway
P4hb__sgRNA2	GTTTGGAATCACGTCCAACAG	ER protein processing pathway
P4hb__sgRNA3	GGTGGACTCAAGCGAAGTGA	ER protein processing pathway
P4hb__sgRNA4	GCACACCTGTATATTCCTTTG	ER protein processing pathway
P4hb__sgRNA5	GCTCTGAGATTCGACTAGCAA	ER protein processing pathway
P4hb__sgRNA6	GTCAGTGAACTCGATGACCAA	ER protein processing pathway
Pdia3__sgRNA1	GCTTCACCAGAGACTCAATGT	ER protein processing pathway
Pdia3__sgRNA2	GATAGTCCACATCATAGTAAG	ER protein processing pathway
Pdia3__sgRNA3	GCTGCTACTTACCCACCACTG	ER protein processing pathway
Pdia3__sgRNA4	GATAGGTGTGGACATTGCAAG	ER protein processing pathway
Pdia3__sgRNA5	GAAACACCTGTAATAAGTATG	ER protein processing pathway
Pdia3__sgRNA6	GCTTAGAAAGCACTACTGGAG	ER protein processing pathway
Pdia4__sgRNA1	GCTGACTGTTAACATACCACG	ER protein processing pathway
Pdia4__sgRNA2	GCTGTAGTATACAACCACCAG	ER protein processing pathway
Pdia4__sgRNA3	GAGCATCCTGATACTGCAAGT	ER protein processing pathway
Pdia4__sgRNA4	GTACTGGAGTTCTATGCACCA	ER protein processing pathway
Pdia4__sgRNA5	GTGGAGGTGTCCAATCAGGCT	ER protein processing pathway
Pdia4__sgRNA6	GCCATACCATATTTCTCTCGT	ER protein processing pathway
Pdia6__sgRNA1	GGTTCTGGCCAGCCGATACG	ER protein processing pathway
Pdia6__sgRNA2	GCATTATCAGAGAACAAATCG	ER protein processing pathway
Pdia6__sgRNA3	GTCAGGATGTTGTTAAAGTCG	ER protein processing pathway
Pdia6__sgRNA4	GTAGTTCAAGTAAGAAAGACG	ER protein processing pathway
Pdia6__sgRNA5	GTTATTCAGAGTGACGGCCTG	ER protein processing pathway
Pdia6__sgRNA6	GCGAGCTGGCGCAAGGCACTG	ER protein processing pathway
Rad23a__sgRNA1	GTCATGTCCATGGGCTACGAG	ER protein processing pathway
Rad23a__sgRNA2	GGGTAGAGATGCTTTCCCCG	ER protein processing pathway
Rad23a__sgRNA3	GAGCTGTGGAGTACTTGCTCA	ER protein processing pathway
Rad23a__sgRNA4	GGGTATCCCGGCACCCCCAG	ER protein processing pathway
Rad23a__sgRNA5	GAGAGGACAAGAGCCCATCAG	ER protein processing pathway
Rad23a__sgRNA6	GACGCAGCTTCCACATTAGG	ER protein processing pathway
Rad23b__sgRNA1	GTGAGAGCAGTATCATCACTG	ER protein processing pathway
Rad23b__sgRNA2	GACTACAACAACCACTTCTGG	ER protein processing pathway
Rad23b__sgRNA3	GAAAATTCTTTACAGTACACC	ER protein processing pathway
Rad23b__sgRNA4	GATATTCCACAGCTCTGTCA	ER protein processing pathway
Rad23b__sgRNA5	GCCAGTACTCACAGCCTGAGG	ER protein processing pathway
Rad23b__sgRNA6	GTGGGGAAGAACTGACTGCAG	ER protein processing pathway
Rbx1__sgRNA1	GTTATCAACCACAATGTCCC	ER protein processing pathway
Rbx1__sgRNA2	GGCCTGACATTCGATACCTG	ER protein processing pathway
Rbx1__sgRNA3	GCTCCTTGCAGTGGAATGCAG	ER protein processing pathway
Rbx1__sgRNA4	GAAGAGTGTACGGTTGCATG	ER protein processing pathway
Rbx1__sgRNA5	GATGGATGTGGATACCCCCAG	ER protein processing pathway
Rbx1__sgRNA6	GCTTCGGAAGTAGCTGACGCC	ER protein processing pathway
Sar1a__sgRNA1	GCAAGATAAGAATTGGCACGT	ER protein processing pathway
Sar1a__sgRNA2	GATGCCCACCGAGATCAAAAG	ER protein processing pathway
Sar1a__sgRNA3	GAAACTATGCCATTAATCGCT	ER protein processing pathway
Sar1a__sgRNA4	GTCCAAAGTTGAGCTTAATGT	ER protein processing pathway
Sar1a__sgRNA5	GATTCTTAGGATTGGACAATG	ER protein processing pathway
Sar1a__sgRNA6	GATGCTGAAAGATGACAGACT	ER protein processing pathway
Sar1b__sgRNA1	GAAGAATTAGAATAGGCACGT	ER protein processing pathway
Sar1b__sgRNA2	GTCCTTGGATTGGATAATGCC	ER protein processing pathway
Sar1b__sgRNA3	GCAATGCCATTGATAGCAGGA	ER protein processing pathway
Sar1b__sgRNA4	GACTTACTGGGATGTAGCGTT	ER protein processing pathway
Sar1b__sgRNA5	GCAGGATTGTATAAAAAGTC	ER protein processing pathway
Sar1b__sgRNA6	GTGGATTGTGCAGACCATGAA	ER protein processing pathway
Sec13__sgRNA1	GATCAGGCCATAGTCATGAG	ER protein processing pathway
Sec13__sgRNA2	GCCTTATAGACCAACCATCA	ER protein processing pathway
Sec13__sgRNA3	GTTTCCGGTCATAGGAACAGG	ER protein processing pathway
Sec13__sgRNA4	GACAACCTCATCAAGCTATGG	ER protein processing pathway
Sec13__sgRNA5	GAAGATTAACAATGCTCACA	ER protein processing pathway
Sec13__sgRNA6	GATGCACAGATGGACTACTA	ER protein processing pathway
Sec23a__sgRNA1	GCTAATCGAGCTGCTACAACG	ER protein processing pathway
Sec23a__sgRNA2	GCTGTACCTGAGGACCGCGTG	ER protein processing pathway
Sec23a__sgRNA3	GTATTCAATGCTTGAAAACTG	ER protein processing pathway
Sec23a__sgRNA4	GACAGGCTCGTACTGGATGGG	ER protein processing pathway
Sec23a__sgRNA5	GCATGATCCGAGCACCAGTGT	ER protein processing pathway
Sec23a__sgRNA6	GTTTGAATTAAGAGACACACA	ER protein processing pathway
Sec62__sgRNA1	GGACGCTTTATTTACAACCA	ER protein processing pathway
Sec62__sgRNA2	GAACCCGATGACCCATCATGT	ER protein processing pathway
Sec62__sgRNA3	GAGGTGTTTATTACCTCAGTG	ER protein processing pathway
Sec62__sgRNA4	GAGAAAAACTTGATCATCATG	ER protein processing pathway
Sec62__sgRNA5	GATCATCTGGCTGATAACTGG	ER protein processing pathway
Sec62__sgRNA6	GCTGCTATTACTGCAATCAC	ER protein processing pathway
Sil1__sgRNA1	GCCTACAGACTGGAGTAAACG	ER protein processing pathway
Sil1__sgRNA2	GTGTTCCACCCAACTCAAGAG	ER protein processing pathway
Sil1__sgRNA3	GAGCAGCATACTCCTTCACCA	ER protein processing pathway
Sil1__sgRNA4	GTGCGCTGGCCAAATTCAAGG	ER protein processing pathway
Sil1__sgRNA5	GCAAGGAAAAACAATACCTGA	ER protein processing pathway
Sil1__sgRNA6	GCAGCTCTTCCGCCCCATTG	ER protein processing pathway
Skp1a__sgRNA1	GACTATCAAGACCATGCTGGA	ER protein processing pathway
Skp1a__sgRNA2	GTGTTGTTGTAGGTCATTCAG	ER protein processing pathway
Skp1a__sgRNA3	GCATCATCCTCAGGAGGAGGA	ER protein processing pathway
Skp1a__sgRNA4	GTAAGTTCAAAAAGTGTTCCT	ER protein processing pathway
Skp1a__sgRNA5	GCTTGATAGTCACAGATTGTT	ER protein processing pathway
Skp1a__sgRNA6	GATGATGAAAACAAAGAAAAG	ER protein processing pathway
Selenos__sgRNA1	GTGTTGTTGTTAAGCGGCAAG	ER protein processing pathway
Selenos__sgRNA2	GCACTAACCCAGAACAGTCT	ER protein processing pathway
Selenos__sgRNA3	GTCTGGATGACAATGTAGAGT	ER protein processing pathway
Selenos__sgRNA4	GGTCTCCAGCGCCGGCCTCG	ER protein processing pathway
Selenos__sgRNA5	GACATAAGGAAAAACTAAGAC	ER protein processing pathway
Selenos__sgRNA6	GAGAGGCTCTCCCTTCGACTG	ER protein processing pathway
Ssr1__sgRNA1	GTCCTGAGGATAACGGAACG	ER protein processing pathway
Ssr1__sgRNA2	GCCAAAGGGTCGTCCTCCCAT	ER protein processing pathway
Ssr1__sgRNA3	GACACTGTAGTGCCACCCCAG	ER protein processing pathway
Ssr1__sgRNA4	GAGAGAACTTACCAAATCTGT	ER protein processing pathway
Ssr1__sgRNA5	GCCTTGTTTGTAAAGCCAACC	ER protein processing pathway
Ssr1__sgRNA6	GCCGCCTCGGAGCAGCACGG	ER protein processing pathway
Ssr2__sgRNA1	GCAGTATAACATCTACAACGT	ER protein processing pathway
Ssr2__sgRNA2	GCTGGGCCAGGTAAGTAATCG	ER protein processing pathway
Ssr2__sgRNA3	GAGCCAGCTTTGAGAGGACGC	ER protein processing pathway
Ssr2__sgRNA4	GACAATGCCGAAGTCTTCTGG	ER protein processing pathway
Ssr2__sgRNA5	GCCAGGAGGATGGACCTGTTG	ER protein processing pathway
Ssr2__sgRNA6	GATTGCTCAACAGATACGCTG	ER protein processing pathway
Ssr3__sgRNA1	GCAACCTGTCGGCCAAATCGT	ER protein processing pathway
Ssr3__sgRNA2	GCCGCCCGAAGCTCACAGATG	ER protein processing pathway
Ssr3__sgRNA3	GTACTAAGTAAGTGCTTACTA	ER protein processing pathway
Ssr3__sgRNA4	GTAATAGGAAGATGTCCCGGA	ER protein processing pathway
Ssr3__sgRNA5	GGTTGCGGCTGAAATCCTGA	ER protein processing pathway
Ssr3__sgRNA6	GCACTGTAGAGCACAGCAGAC	ER protein processing pathway
Stub1__sgRNA1	GAAGCGCTGGAACAGTATCG	ER protein processing pathway
Stub1__sgRNA2	GGAGATGGAGAGTTATGATG	ER protein processing pathway
Stub1__sgRNA3	GTGTAGTACACTGCCACAAGT	ER protein processing pathway
Stub1__sgRNA4	GGAGCAGCGACTCAACTTTG	ER protein processing pathway
Stub1__sgRNA5	GCGTGGGCCGCAAGTACCCGG	ER protein processing pathway
Stub1__sgRNA6	GCTGGACGGGCAGTCTGTGA	ER protein processing pathway
Tram1__sgRNA1	GCAATGTAGACGAGCTGACGA	ER protein processing pathway
Tram1__sgRNA2	GAATGAACGTGCCCCACACAC	ER protein processing pathway
Tram1__sgRNA3	GTTTGATACCATAGTGATATA	ER protein processing pathway
Tram1__sgRNA4	GCATAATTCAGGAGTATGTGT	ER protein processing pathway
Tram1__sgRNA5	GACTTACGTCATCAGGTTATG	ER protein processing pathway
Tram1__sgRNA6	GCCTCGAACATAAGCCCCAGC	ER protein processing pathway
Ube2d2a__sgRNA1	GCATATACCATTTACCTTAGG	ER protein processing pathway
Ube2d2a__sgRNA2	GAATGACAGCCCCTATCAGGG	ER protein processing pathway
Ube2d2a__sgRNA3	GTCTTAAGGAATTGAATGACC	ER protein processing pathway
Ube2d2a__sgRNA4	GTTGATATTCTACGGTCACAG	ER protein processing pathway
Ube2d2a__sgRNA5	GATTGGCAGGCTACAATAATG	ER protein processing pathway
Ube2d2a__sgRNA6	GTACTTACTATCATCTCCAAC	ER protein processing pathway
Ube2j1__sgRNA1	GTTCTCTAGATTACACACCCG	ER protein processing pathway
Ube2j1__sgRNA2	GCTAATGGACGATTTGAAGT	ER protein processing pathway
Ube2j1__sgRNA3	GAATGGCACTTCACAGTTAGA	ER protein processing pathway
Ube2j1__sgRNA4	GAGTCGGCATAAACCCGATGA	ER protein processing pathway
Ube2j1__sgRNA5	GAGTCATTTAGTGAGAAACAC	ER protein processing pathway
Ube2j1__sgRNA6	GTGAGCGTGGTAATGATCTGT	ER protein processing pathway
Ubqln1__sgRNA1	GCACAACTTACCTACGCCAA	ER protein processing pathway
Ubqln1__sgRNA2	GAACACCATGAGCACCTCTGG	ER protein processing pathway
Ubqln1__sgRNA3	GATCGGTGTACATGCGCCGTA	ER protein processing pathway
Ubqln1__sgRNA4	GCAGCAAATATCAACACAAGT	ER protein processing pathway
Ubqln1__sgRNA5	GTGCTGAGCTGAATTATCTTG	ER protein processing pathway
Ubqln1__sgRNA6	GCAGGATTTGAGAGCATGCTC	ER protein processing pathway
Ubqln2__sgRNA1	GAAAGGAGCTGCTATTCGTGG	ER protein processing pathway
Ubqln2__sgRNA2	GCGGATCACGATTCTCCGTG	ER protein processing pathway
Ubqln2__sgRNA3	GAATCTCGAAAGCATCCCAGG	ER protein processing pathway
Ubqln2__sgRNA4	GCATGGCTGCAGCTAATTACG	ER protein processing pathway
Ubqln2__sgRNA5	GAAAATCAGCACGAGCTGAT	ER protein processing pathway
Ubqln2__sgRNA6	GTGCTGTCTGCGCCCTACATG	ER protein processing pathway
Ufd1__sgRNA1	GTACTTACTGAGTTGATCGA	ER protein processing pathway
Ufd1__sgRNA2	GGGAGCATCAAAATCCACCT	ER protein processing pathway
Ufd1__sgRNA3	GTCAGATCGGATGACACACTG	ER protein processing pathway
Ufd1__sgRNA4	GAGGATACACCGCTTTAGGGT	ER protein processing pathway
Ufd1__sgRNA5	GACAGCTCAACTCACCCAGTG	ER protein processing pathway
Ufd1__sgRNA6	GGAAAGTGTCAACCTCCAAG	ER protein processing pathway
Ubxn1__sgRNA1	GAAACAGAATGTTGGAACTTG	ER protein processing pathway
Ubxn1__sgRNA2	GCATGAAGACGACCCCGATG	ER protein processing pathway
Ubxn1__sgRNA3	GCCTGTCTCTATTCTAGACAA	ER protein processing pathway
Ubxn1__sgRNA4	GCCCACGCCCTCAGAGCAAGT	ER protein processing pathway
Ubxn1__sgRNA5	GCTGGCCCTCACAGGGAACCA	ER protein processing pathway
Ubxn1__sgRNA6	GAGTTGCACGACAGAAACTGC	ER protein processing pathway
Ubxn2a__sgRNA1	GATGCTTACCTTCCTAGTCTG	ER protein processing pathway
Ubxn2a__sgRNA2	GAATTACCTTCAGAATTATG	ER protein processing pathway
Ubxn2a__sgRNA3	GAAAATTCCCCATAATTCTGA	ER protein processing pathway
Ubxn2a__sgRNA4	GTTGAGGGGTTGACTGTCAGG	ER protein processing pathway
Ubxn2a__sgRNA5	GTAGATGTAAATATAAAATTG	ER protein processing pathway
Ubxn2a__sgRNA6	GCCTTCCCTGCTTCCTCAAAA	ER protein processing pathway
Ubxn4__sgRNA1	GTCCCTTTGGAAGTAATAGCG	ER protein processing pathway
Ubxn4__sgRNA2	GACATACATCAGGTTCAAATG	ER protein processing pathway
Ubxn4__sgRNA3	GTTCAAACCAGAGACCAGCCG	ER protein processing pathway
Ubxn4__sgRNA4	GAGTCTACAGCACGAGACAGA	ER protein processing pathway
Ubxn4__sgRNA5	GTCTTCGTGGTGTTCGTGGC	ER protein processing pathway
Ubxn4__sgRNA6	GAATTTGTGAAAACTGCAGAC	ER protein processing pathway
Vcp__sgRNA1	GACTGTCTTCACAGACTCATG	ER protein processing pathway
Vcp__sgRNA2	GTATTTACCAAATCGCCGTA	ER protein processing pathway
Vcp__sgRNA3	GCCAATCGCCTTAAAGAGCGC	ER protein processing pathway
Vcp__sgRNA4	GCAAACCTGATGACATCTCCT	ER protein processing pathway
Vcp__sgRNA5	GTAGAAAAGAACGCCTTTGGA	ER protein processing pathway
Vcp__sgRNA6	GCACCCAACTTACCTGGGACA	ER protein processing pathway
Mir181a-1__sgRNA1	GAGGGTACAATCAACGGTCGA	Essential for photoreceptor survival (protective effect when downregulating)
Mir181a-1__sgRNA2	GTAGCTATAGGGTACAATCAA	Essential for photoreceptor survival (protective effect when downregulating)
Mir181a-1__sgRNA3	GAGTAGATGATGGTTAGCTAT	Essential for photoreceptor survival (protective effect when downregulating)
Mir181a-1__sgRNA4	GCAGTGAACATTCAACGCTGT	Essential for photoreceptor survival (protective effect when downregulating)
Mir181a-1__sgRNA5	GTAGATGATGGTTAGCTATA	Essential for photoreceptor survival (protective effect when downregulating)
Mir181a-1__sgRNA6	GTTCAACGCTGTCGGTGAGTT	Essential for photoreceptor survival (protective effect when downregulating)
Mir181b-1__sgRNA1	GCTGAACAATGAATGCAACTG	Essential for photoreceptor survival (protective effect when downregulating)
Mir181b-1__sgRNA2	GCAACATTCATTGCTGTCGGT	Essential for photoreceptor survival (protective effect when downregulating)
Mir181b-1__sgRNA3	GCAATCAACATTCATTGCTGT	Essential for photoreceptor survival (protective effect when downregulating)
Mir181b-1__sgRNA4	GTCAACATTCATTGCTGTCGG	Essential for photoreceptor survival (protective effect when downregulating)
Sarm1__sgRNA1	GCTAGACCGATGCGCGCCACG	Essential for photoreceptor survival (protective effect when downregulating)
Sarm1__sgRNA2	GACCAGTACAGCACCGCGTCG	Essential for photoreceptor survival (protective effect when downregulating)
Sarm1__sgRNA3	GAATCAAGCATCACCCGCAAG	Essential for photoreceptor survival (protective effect when downregulating)
Sarm1__sgRNA4	GATGCTATACGTCTGGACGG	Essential for photoreceptor survival (protective effect when downregulating)
Sarm1__sgRNA5	GCATTCGTAGAGTAAGAAACC	Essential for photoreceptor survival (protective effect when downregulating)
Sarm1__sgRNA6	GCGAGCTGAAACAGGCAAGCG	Essential for photoreceptor survival (protective effect when downregulating)
Tsc2__sgRNA1	GTGAACCACATGGCTATGACG	Essential for photoreceptor survival (protective effect when downregulating)
Tsc2__sgRNA2	GCAGTACACCATCTCACGCTG	Essential for photoreceptor survival (protective effect when downregulating)
Tsc2__sgRNA3	GTTATTGAAGGCCATTGTACA	Essential for photoreceptor survival (protective effect when downregulating)
Tsc2__sgRNA4	GCACAGGGTGATAATGAACAG	Essential for photoreceptor survival (protective effect when downregulating)
Tsc2__sgRNA5	GATTTCACTGCAGTCCCCAAG	Essential for photoreceptor survival (protective effect when downregulating)
Tsc2__sgRNA6	GGAAAGATACTATGAACTGG	Essential for photoreceptor survival (protective effect when downregulating)
Aipl1__sgRNA1	GGCCCCAAATGAGTACCAGA	Retinal disease gene (POSITIVE CONTROL)
Aipl1__sgRNA2	GAAGAAGACCATTCTGCATGG	Retinal disease gene (POSITIVE CONTROL)
Aipl1__sgRNA3	GATGTTTGCATACCACACGCT	Retinal disease gene (POSITIVE CONTROL)
Aipl1__sgRNA4	GTCCATATCTCTACAGCACAC	Retinal disease gene (POSITIVE CONTROL)
Aipl1__sgRNA5	GCGTCATCACACTTCATTGTG	Retinal disease gene (POSITIVE CONTROL)
Aipl1__sgRNA6	GTTGCCGATGATGATGCTCAT	Retinal disease gene (POSITIVE CONTROL)
Cep290__sgRNA1	GCTAGTTCTAGAATCCGCTGT	Retinal disease gene (POSITIVE CONTROL)
Cep290__sgRNA2	GAAGGCATAGACTTACCCGAT	Retinal disease gene (POSITIVE CONTROL)
Cep290__sgRNA3	GTTTGCAGATCGAAAGTCTAG	Retinal disease gene (POSITIVE CONTROL)
Cep290__sgRNA4	GACAAAGTAATCAATGAACTG	Retinal disease gene (POSITIVE CONTROL)
Cep290__sgRNA5	GAGAGGACGATCCAGTCATGA	Retinal disease gene (POSITIVE CONTROL)
Cep290__sgRNA6	GTCGCTTCGAAGACAGTTCAG	Retinal disease gene (POSITIVE CONTROL)
Nmnat1__sgRNA1	GAAAGGCATTATCTCACCGGT	Retinal disease gene (POSITIVE CONTROL)
Nmnat1__sgRNA2	GAACAGCCTGAGGTGCATGT	Retinal disease gene (POSITIVE CONTROL)
Nmnat1__sgRNA3	GTTCTGCCATGATGATTCGG	Retinal disease gene (POSITIVE CONTROL)
Nmnat1__sgRNA4	GGAGGACATCACGCAAATCG	Retinal disease gene (POSITIVE CONTROL)
Nmnat1__sgRNA5	GCTGGGTGGAAGTGGATACGT	Retinal disease gene (POSITIVE CONTROL)
Nmnat1__sgRNA6	GCCCACACAGCAATTTCACCT	Retinal disease gene (POSITIVE CONTROL)
Pde6a__sgRNA1	GCACAACTGTGAGACTCGTCG	Retinal disease gene (POSITIVE CONTROL)
Pde6a__sgRNA2	GAGTGGTCTCCCCACTTACG	Retinal disease gene (POSITIVE CONTROL)
Pde6a__sgRNA3	GCCTCTACGCTGTTCACATCG	Retinal disease gene (POSITIVE CONTROL)
Pde6a__sgRNA4	GTTGGGAACAGAAAACCAGAG	Retinal disease gene (POSITIVE CONTROL)
Pde6a__sgRNA5	GTCTCGTCCATATCGTCGAA	Retinal disease gene (POSITIVE CONTROL)
Pde6a__sgRNA6	GAAGAGCCTAGTGGCCAACT	Retinal disease gene (POSITIVE CONTROL)
Pde6b__sgRNA1	GCATAGCTGAACTTGCTACG	Retinal disease gene (POSITIVE CONTROL)
Pde6b__sgRNA2	GACACCTTATTGGCTGACCAG	Retinal disease gene (POSITIVE CONTROL)
Pde6b__sgRNA3	GTCATCGATTATATCCTCCA	Retinal disease gene (POSITIVE CONTROL)
Pde6b__sgRNA4	GTCGGCGAATGAGCTGAAGTG	Retinal disease gene (POSITIVE CONTROL)
Pde6b__sgRNA5	GCCTGCGAGAGCTGTGCCAGG	Retinal disease gene (POSITIVE CONTROL)
Pde6b__sgRNA6	GACCCATCCTGAATCATCCAG	Retinal disease gene (POSITIVE CONTROL)
Prpf8__sgRNA1	GTAAACCGGCTCGATAACCCA	Retinal disease gene (POSITIVE CONTROL)
Prpf8__sgRNA2	GTGTACTGTAGTCACCGATCG	Retinal disease gene (POSITIVE CONTROL)
Prpf8__sgRNA3	GCCTGTCAACTGTCCCACGT	Retinal disease gene (POSITIVE CONTROL)
Prpf8__sgRNA4	GTCGCAGCAGCCTGTTAAGCA	Retinal disease gene (POSITIVE CONTROL)
Prpf8__sgRNA5	GAACCGGGAACGGATCCGTCG	Retinal disease gene (POSITIVE CONTROL)
Prpf8__sgRNA6	GGCGGGTACGACCAGAGCGT	Retinal disease gene (POSITIVE CONTROL)
Rho__sgRNA1	GTCTGCTCATACCTCCAAGTG	Retinal disease gene (POSITIVE CONTROL)
Rho__sgRNA2	GATGAGCAACTTCCGCTTCG	Retinal disease gene (POSITIVE CONTROL)
Rho__sgRNA3	GCCTGGACCAGCCAACGAGTG	Retinal disease gene (POSITIVE CONTROL)
Rho__sgRNA4	GAGTACTACCTGGCGGAACCA	Retinal disease gene (POSITIVE CONTROL)
Rho__sgRNA5	GTACGGTGACGTAGAGCGTG	Retinal disease gene (POSITIVE CONTROL)
Rho__sgRNA6	GCTACTACACACTCAAGCCTG	Retinal disease gene (POSITIVE CONTROL)
Ttc21b__sgRNA1	GTGTTCATGTACGCATCGCCG	Retinal disease gene (POSITIVE CONTROL)
Ttc21b__sgRNA2	GCTCTCATTCAGCGTCATGG	Retinal disease gene (POSITIVE CONTROL)
Ttc21b__sgRNA3	GCTTCAAGACAATCACAACG	Retinal disease gene (POSITIVE CONTROL)
Ttc21b__sgRNA4	GAATGCCACATGATAGCAATG	Retinal disease gene (POSITIVE CONTROL)
Ttc21b__sgRNA5	GCCAGGAAGATGGATAACCGA	Retinal disease gene (POSITIVE CONTROL)
Ttc21b__sgRNA6	GCACTTGGAAGACCTCCCGCT	Retinal disease gene (POSITIVE CONTROL)
A1	GTGCCTATTGCTACTAAAAA	Untargeting gRNA (NEGATIVE CONTROL)
A2	GTAATACTACCTACTAGCCAA	Untargeting gRNA (NEGATIVE CONTROL)
A3	GTCTTGCTAGAAAAACAAAGC	Untargeting gRNA (NEGATIVE CONTROL)
A4	GATTCGATTCATGTAGTTGCC	Untargeting gRNA (NEGATIVE CONTROL)
A5	GTAAATAGTAGGTTCATGTGA	Untargeting gRNA (NEGATIVE CONTROL)
A6	GAATGCCTTGCTTATTATGGA	Untargeting gRNA (NEGATIVE CONTROL)
A7	GTTCGATTTCAGCCATACATT	Untargeting gRNA (NEGATIVE CONTROL)
A8	GCCATAAACGGCGCCTATCTA	Untargeting gRNA (NEGATIVE CONTROL)
A9	GGATTGTTTCTGCTTACCTA	Untargeting gRNA (NEGATIVE CONTROL)
A10	GTGGACGTAGTTAAGGACTAT	Untargeting gRNA (NEGATIVE CONTROL)
A11	GACGCAATGGTTTCTATAAGG	Untargeting gRNA (NEGATIVE CONTROL)
A12	GTGTCGCCCGGGAGACACTTT	Untargeting gRNA (NEGATIVE CONTROL)
A13	GTTCCAGGCTTCCGGCATTGA	Untargeting gRNA (NEGATIVE CONTROL)
A14	GGACGTCTACAGTCGCCAGT	Untargeting gRNA (NEGATIVE CONTROL)
A15	GAGTACTATTGCTATTCACTT	Untargeting gRNA (NEGATIVE CONTROL)
A16	GTGACGTGTTAGCTGATTGAT	Untargeting gRNA (NEGATIVE CONTROL)
A17	GTAAAGATGCCCAGAAATGTA	Untargeting gRNA (NEGATIVE CONTROL)
A18	GCTGAACTCCCTAGAGAAATA	Untargeting gRNA (NEGATIVE CONTROL)
A19	GACCTGAATAACTGCATATC	Untargeting gRNA (NEGATIVE CONTROL)
A20	GATATTGGGTCTATCATCGTA	Untargeting gRNA (NEGATIVE CONTROL)
A21	GCCAATTCGGTACTTGCTGTA	Untargeting gRNA (NEGATIVE CONTROL)
A22	GCCATGCCAAGACTATCGTTC	Untargeting gRNA (NEGATIVE CONTROL)
A23	GATAGAAGCGCTGCAACCTCG	Untargeting gRNA (NEGATIVE CONTROL)
A24	GTTCCTCGGTCACGGTAAAAA	Untargeting gRNA (NEGATIVE CONTROL)
A25	GATGTCAGTCCGCTGAGCGGT	Untargeting gRNA (NEGATIVE CONTROL)
A26	GGATATTATTTATTAAGTCG	Untargeting gRNA (NEGATIVE CONTROL)
B1	GCTAAGGCTATGTGGGATCT	Untargeting gRNA (NEGATIVE CONTROL)
B3	GCTTGATCCAGGCTGTCAACC	Untargeting gRNA (NEGATIVE CONTROL)
B4	GAGAGCATGCCAACATGAAC	Untargeting gRNA (NEGATIVE CONTROL)
B5	GTAGGTTAGTACATCTTCGTA	Untargeting gRNA (NEGATIVE CONTROL)
B6	GGATTTAAAATGCGGTGGTA	Untargeting gRNA (NEGATIVE CONTROL)
B7	GTTAGCGCACTTCATACCTGC	Untargeting gRNA (NEGATIVE CONTROL)
B8	GAATCCACGACGATCGTGAAC	Untargeting gRNA (NEGATIVE CONTROL)
B9	GAACGTTACTCAAATGGCACC	Untargeting gRNA (NEGATIVE CONTROL)
B10	GAGTATAACTGGTTGCCCCCT	Untargeting gRNA (NEGATIVE CONTROL)
B11	GACAGCTGCAAAGATTTACAT	Untargeting gRNA (NEGATIVE CONTROL)
B12	GTTCGTCCATTGCATTTAACA	Untargeting gRNA (NEGATIVE CONTROL)
B13	GATCTGTCATCATGCTTCTAG	Untargeting gRNA (NEGATIVE CONTROL)
B14	GAATTAACTTGAAGCGCCGAC	Untargeting gRNA (NEGATIVE CONTROL)
B15	GCGATTCTTTTAGGTGCTCTT	Untargeting gRNA (NEGATIVE CONTROL)
B16	GCATACCGGTTAGCTAAGTAT	Untargeting gRNA (NEGATIVE CONTROL)
B17	GCTCAACGAGCACTATACACC	Untargeting gRNA (NEGATIVE CONTROL)
B18	GCACATACATGGTAGAAATTT	Untargeting gRNA (NEGATIVE CONTROL)
B19	GTGGTAATTGAATAGGGTTGT	Untargeting gRNA (NEGATIVE CONTROL)
B21	GCTCTGATGCAGTTATTTGAA	Untargeting gRNA (NEGATIVE CONTROL)
B22	GCATAATTGGGACTGACATTA	Untargeting gRNA (NEGATIVE CONTROL)
B23	GCAGATGCCTTGGAAAGTTTA	Untargeting gRNA (NEGATIVE CONTROL)
B24	GACGGAACGCCACGACTAAGG	Untargeting gRNA (NEGATIVE CONTROL)
B25	GTGCCACTACCCCTATTCTG	Untargeting gRNA (NEGATIVE CONTROL)
B26	GTTCATCAAAATCCTCAGTGT	Untargeting gRNA (NEGATIVE CONTROL)
C1	GAAACAAATTGGCGTGTAAGT	Untargeting gRNA (NEGATIVE CONTROL)
C2	GCGGTAGGTCACATCTCTAAA	Untargeting gRNA (NEGATIVE CONTROL)
C3	GTCCAACAGAAGATCCCCAA	Untargeting gRNA (NEGATIVE CONTROL)
C4	GATGGGGAGCGCCACAAAAAC	Untargeting gRNA (NEGATIVE CONTROL)
C5	GCATAAATTGTCAGCGCGAAT	Untargeting gRNA (NEGATIVE CONTROL)
C6	GATAGATGTAAACCCAGACTA	Untargeting gRNA (NEGATIVE CONTROL)
C7	GAGTAAAGGAAATAGTATTTG	Untargeting gRNA (NEGATIVE CONTROL)
C8	GATTTCTCAAACAAACGATAT	Untargeting gRNA (NEGATIVE CONTROL)
C9	GCACTTGTAATGCTGACGAGG	Untargeting gRNA (NEGATIVE CONTROL)
C10	GCGCTTATATTACTTGGTATA	Untargeting gRNA (NEGATIVE CONTROL)
C11	GCATCGATCTCAAATAGAACA	Untargeting gRNA (NEGATIVE CONTROL)
C13	GAGTATTTAACATGTGAGAAA	Untargeting gRNA (NEGATIVE CONTROL)
C14	GTGGAAATCTCAAGTCTCAGT	Untargeting gRNA (NEGATIVE CONTROL)
C15	GACTATAAAGTTATCTGTACA	Untargeting gRNA (NEGATIVE CONTROL)
C16	GCAATCGTAGACTACTCTAAT	Untargeting gRNA (NEGATIVE CONTROL)
C17	GCTGCTTGTGGCGAACAGGAA	Untargeting gRNA (NEGATIVE CONTROL)
C18	GCCGGAAACATCTTAGTACTG	Untargeting gRNA (NEGATIVE CONTROL)
C20	GTGCGGATAATCGTACGGAA	Untargeting gRNA (NEGATIVE CONTROL)
C21	GCTGTTAGAAGGGAGCGCTTA	Untargeting gRNA (NEGATIVE CONTROL)
C22	GTGAAATCTAACGGCCGGGAT	Untargeting gRNA (NEGATIVE CONTROL)
C23	GCTGTAGGCTTTCACAAGGGC	Untargeting gRNA (NEGATIVE CONTROL)
C24	GAATTAGTGGCAACTGCGTCC	Untargeting gRNA (NEGATIVE CONTROL)
C25	GCCTAGGTACAGGTCCTCCAG	Untargeting gRNA (NEGATIVE CONTROL)
C26	GAGCCCCGTTTTAGGACGAT	Untargeting gRNA (NEGATIVE CONTROL)
D1	GTTATTTATTTTTGAGGGTTA	Untargeting gRNA (NEGATIVE CONTROL)
D2	GTGGTGAACCTGACCACGGAT	Untargeting gRNA (NEGATIVE CONTROL)
D3	GTTATCGTGCTCCAGCTCGGG	Untargeting gRNA (NEGATIVE CONTROL)
D4	GACGTACGCATGTTCTCGGTA	Untargeting gRNA (NEGATIVE CONTROL)
D5	GCACGTATAGTGTCGAGGCTC	Untargeting gRNA (NEGATIVE CONTROL)
D6	GTGTCCAATTTCAACAGTAAT	Untargeting gRNA (NEGATIVE CONTROL)
D7	GAATCTATGTGCGGATAGGAA	Untargeting gRNA (NEGATIVE CONTROL)
D8	GCTCCCAACGCGTGACCCTGT	Untargeting gRNA (NEGATIVE CONTROL)
D9	GCGTTGCTTTCGCTAAATACG	Untargeting gRNA (NEGATIVE CONTROL)
D10	GATACTTTACACAGAACGCAG	Untargeting gRNA (NEGATIVE CONTROL)
D11	GATCGAACAACGGACGCCGGT	Untargeting gRNA (NEGATIVE CONTROL)
D12	GTCCTACTTCTAAAATTAGCT	Untargeting gRNA (NEGATIVE CONTROL)
D13	GTTAATCTTAATACGATATTT	Untargeting gRNA (NEGATIVE CONTROL)
D14	GTTCAAATATTAAACAGCAAA	Untargeting gRNA (NEGATIVE CONTROL)
D15	GTTACATATGAAAAGCTCGTT	Untargeting gRNA (NEGATIVE CONTROL)
D16	GCTTCCCAGCGTGAGGGTCTT	Untargeting gRNA (NEGATIVE CONTROL)
D17	GAAGTTTAGGGGACAGGAAAA	Untargeting gRNA (NEGATIVE CONTROL)
D18	GCATTAAATAGTGACCTTCAT	Untargeting gRNA (NEGATIVE CONTROL)
D19	GAGTACCCTTGTGATGGCTGT	Untargeting gRNA (NEGATIVE CONTROL)
D20	GAGGATTATACCCTTTGTGAA	Untargeting gRNA (NEGATIVE CONTROL)
D21	GACGGATTTCATGTGAGTTTA	Untargeting gRNA (NEGATIVE CONTROL)
D22	GAATCCAAGTAATAATACTG	Untargeting gRNA (NEGATIVE CONTROL)
D23	GAGAAGTAAACCCACGTATA	Untargeting gRNA (NEGATIVE CONTROL)
D24	GCTTATGCCATTGGCTACTGA	Untargeting gRNA (NEGATIVE CONTROL)
D25	GACAGCTTAATCATTAACGCA	Untargeting gRNA (NEGATIVE CONTROL)
D26	GACACCTACAAGCAGTTGAAT	Untargeting gRNA (NEGATIVE CONTROL)
Supplemental Table 1: gRNA sequences contained in the primary screen library.

## Sheet: Supplemental Table 2
Gene_gRNA	gRNA sequence	Description
>Cul1_sgRNA1	GAAGTTCTACACTCAGCAGT	ER protein processing pathway
>Cul1_sgRNA2	TCGCTTCATAAACAACAATG	ER protein processing pathway
>Cul1_sgRNA3	TGTACTTGAAGACCACCATC	ER protein processing pathway
>Cul1_sgRNA4	ATCAATACAAGACTGATTAG	ER protein processing pathway
>Cul1_sgRNA5	AACACCTTACCACTTGATTG	ER protein processing pathway
>Cul1_sgRNA6	GGTGGTCTTCAAGTACATCG	ER protein processing pathway
>Cul1_sgRNA7	TAGATACAAGATTATACATG	ER protein processing pathway
>Cul1_sgRNA8	CATCAGTCCAACCAAGCCCG	ER protein processing pathway
>Cul1_sgRNA9	CATCTTGTGTGCTCTCGTGG	ER protein processing pathway
>Cul1_sgRNA10	CTGTCTGCACATACATCTTG	ER protein processing pathway
>Eif2s1_sgRNA1	AGAGGAAGCAATCAAATGTG	ER protein processing pathway
>Eif2s1_sgRNA2	GTACTTGTCATCGAAGACCC	ER protein processing pathway
>Eif2s1_sgRNA3	GCGAAGAATGCTATAAACCT	ER protein processing pathway
>Eif2s1_sgRNA4	CAAGCGGTCAAAATTCGAGC	ER protein processing pathway
>Eif2s1_sgRNA5	TAGGCGTTTGACCCCACAAG	ER protein processing pathway
>Eif2s1_sgRNA6	TGAGGTATTAGAATATACCA	ER protein processing pathway
>Eif2s1_sgRNA7	AAGATCCATTGCTGAAATGG	ER protein processing pathway
>Eif2s1_sgRNA8	GATGACAAGTACAAGAGACC	ER protein processing pathway
>Eif2s1_sgRNA9	ATATTCCAACAAGCTGACAT	ER protein processing pathway
>Eif2s1_sgRNA10	TAAGATCCATTGCTGAAATG	ER protein processing pathway
>Hspa5_sgRNA1	GATGCGGTTGCCCTGATCGT	ER protein processing pathway
>Hspa5_sgRNA2	TGTGTTCAAGAACGGCCGCG	ER protein processing pathway
>Hspa5_sgRNA3	TGTGCAGAAACTCCGGCGTG	ER protein processing pathway
>Hspa5_sgRNA4	CATTCCAAGTGCGTCCGATG	ER protein processing pathway
>Hspa5_sgRNA5	CGTTGGCTATGATCTCCACG	ER protein processing pathway
>Hspa5_sgRNA6	GGAGCGTCTGATTGGCGATG	ER protein processing pathway
>Hspa5_sgRNA7	GGTGAGAAGAGACACATCGA	ER protein processing pathway
>Hspa5_sgRNA8	TAAAATGAAGGAGACTGCTG	ER protein processing pathway
>Hspa5_sgRNA9	GAAGCCTGTCCAGAAAGTGT	ER protein processing pathway
>Hspa5_sgRNA10	CCGTGGCATAAACCCCGATG	ER protein processing pathway
>Nploc4_sgRNA1	TCTACAGAAATACCGACACG	ER protein processing pathway
>Nploc4_sgRNA2	TCAGCTGCAAGATTAAGTCA	ER protein processing pathway
>Nploc4_sgRNA3	AGGGTACAGTCCGATACAGT	ER protein processing pathway
>Nploc4_sgRNA4	ACTCTGCACTCACGCACCTG	ER protein processing pathway
>Nploc4_sgRNA5	AGATACCATTTGGCCATGGG	ER protein processing pathway
>Nploc4_sgRNA6	GAGAGAGCCGGCAAATGTTG	ER protein processing pathway
>Nploc4_sgRNA7	TGAGGACTATCTGAACCACT	ER protein processing pathway
>Nploc4_sgRNA8	TGTCTCAGAAGACACCCGAA	ER protein processing pathway
>Nploc4_sgRNA9	AAAGGCCTTTAACCCTACCG	ER protein processing pathway
>Nploc4_sgRNA10	CCAGGTATCCAATCAGTGCA	ER protein processing pathway
>Ufd1_sgRNA1	AGGATACACCGCTTTAGGGT	ER protein processing pathway
>Ufd1_sgRNA2	GTACTTACTGAGTTGATCGA	ER protein processing pathway
>Ufd1_sgRNA3	TAGAGTAGGTCGCCACTTGG	ER protein processing pathway
>Ufd1_sgRNA4	AGTACTTACTGAGTTGATCG	ER protein processing pathway
>Ufd1_sgRNA5	TCAGATCGGATGACACACTG	ER protein processing pathway
>Ufd1_sgRNA6	TGCTAGCAGGGCCTAATGAC	ER protein processing pathway
>Ufd1_sgRNA7	CAGCTCAACTCACCCAGTGG	ER protein processing pathway
>Ufd1_sgRNA8	GGGAGCATCAAAATCCACCT	ER protein processing pathway
>Ufd1_sgRNA9	ATCAACTACAATGAGAAGGT	ER protein processing pathway
>Ufd1_sgRNA10	AGCGGTACTGCGTGGAGAAG	ER protein processing pathway
>Skp1a_sgRNA1	CTGTGGCCAATATGATTAAG	ER protein processing pathway
>Skp1a_sgRNA2	TGTGACTATCAAGACCATGC	ER protein processing pathway
>Skp1a_sgRNA3	ACTATCAAGACCATGCTGGA	ER protein processing pathway
>Skp1a_sgRNA4	TGTTGTTGTAGGTCATTCAG	ER protein processing pathway
>Skp1a_sgRNA5	AGATGACCCTCCTCCTCCTG	ER protein processing pathway
>Skp1a_sgRNA6	GAGGAGGGTCATCTTTGTGG	ER protein processing pathway
>Skp1a_sgRNA7	TGATGTCACATGCAAGACTG	ER protein processing pathway
>Skp1a_sgRNA8	GAATTCCTGAAAGTTGACCA	ER protein processing pathway
>Skp1a_sgRNA9	GCAAACTACTTAGACATCAA	ER protein processing pathway
>Skp1a_sgRNA10	ATGATGAAAACAAAGAAAAG	ER protein processing pathway
>Aipl1_sgRNA1	GGCCCCAAATGAGTACCAGA	Retinal disease gene (POSITIVE CONTROL)
>Aipl1_sgRNA2	TCCATATCTCTACAGCACAC	Retinal disease gene (POSITIVE CONTROL)
>Aipl1_sgRNA3	GGTGATCGATGACAGCAAGC	Retinal disease gene (POSITIVE CONTROL)
>Aipl1_sgRNA4	AAGAAGACCATTCTGCATGG	Retinal disease gene (POSITIVE CONTROL)
>Aipl1_sgRNA5	AAGGTTCCTCAGGCACACAA	Retinal disease gene (POSITIVE CONTROL)
>Aipl1_sgRNA6	GGCAACAGGCTCTACAAGCT	Retinal disease gene (POSITIVE CONTROL)
>Aipl1_sgRNA7	GGTCCTCGTAGCCCAGCGTG	Retinal disease gene (POSITIVE CONTROL)
>Aipl1_sgRNA8	TGTGCACATGCCAGCTTGTG	Retinal disease gene (POSITIVE CONTROL)
>Aipl1_sgRNA9	CATGTTCAAGCTGGAGGTGT	Retinal disease gene (POSITIVE CONTROL)
>Aipl1_sgRNA10	TTGCCTTCTCCATGAAGAAG	Retinal disease gene (POSITIVE CONTROL)
>Cep290_sgRNA1	ACAAAGTAATCAATGAACTG	Retinal disease gene (POSITIVE CONTROL)
>Cep290_sgRNA2	AAAGGCATAGACTTACCCGA	Retinal disease gene (POSITIVE CONTROL)
>Cep290_sgRNA3	GGCTCCAATGTAGTATACAA	Retinal disease gene (POSITIVE CONTROL)
>Cep290_sgRNA4	GCAGATCGAAAGTCTAGAGG	Retinal disease gene (POSITIVE CONTROL)
>Cep290_sgRNA5	AGAGGACGATCCAGTCATGA	Retinal disease gene (POSITIVE CONTROL)
>Cep290_sgRNA6	CTAGTTCTAGAATCCGCTGT	Retinal disease gene (POSITIVE CONTROL)
>Cep290_sgRNA7	ATTAGCTGATAGTGTGACCA	Retinal disease gene (POSITIVE CONTROL)
>Cep290_sgRNA8	GCGACTGAATGGTTTGGCGC	Retinal disease gene (POSITIVE CONTROL)
>Cep290_sgRNA9	ATCGCTAAAAGAACAGATGG	Retinal disease gene (POSITIVE CONTROL)
>Cep290_sgRNA10	GTTGGCTCTTCGAAATGAGG	Retinal disease gene (POSITIVE CONTROL)
>Nmnat1_sgRNA1	ACTATATGCATGCTACAGGT	Retinal disease gene (POSITIVE CONTROL)
>Nmnat1_sgRNA2	GTTCTGCCATGATGATTCGG	Retinal disease gene (POSITIVE CONTROL)
>Nmnat1_sgRNA3	GAACAGCCTGAGGTGCATGT	Retinal disease gene (POSITIVE CONTROL)
>Nmnat1_sgRNA4	GGAGGACATCACGCAAATCG	Retinal disease gene (POSITIVE CONTROL)
>Nmnat1_sgRNA5	AAAGGCATTATCTCACCGGT	Retinal disease gene (POSITIVE CONTROL)
>Nmnat1_sgRNA6	AGCCCACCACCGAATCATCA	Retinal disease gene (POSITIVE CONTROL)
>Nmnat1_sgRNA7	ACTGGGTGGAAGTGGATACG	Retinal disease gene (POSITIVE CONTROL)
>Nmnat1_sgRNA8	CAAGGTGAAATTGCTGTGTG	Retinal disease gene (POSITIVE CONTROL)
>Nmnat1_sgRNA9	GCCTGGGCGGAAGAGGAAGT	Retinal disease gene (POSITIVE CONTROL)
>Nmnat1_sgRNA10	TGGAGACTGTGAAGGTGCTC	Retinal disease gene (POSITIVE CONTROL)
>Pde6a_sgRNA1	GAGTGGTCTCCCCACTTACG	Retinal disease gene (POSITIVE CONTROL)
>Pde6a_sgRNA2	AACTGTGACAGATACTCCGT	Retinal disease gene (POSITIVE CONTROL)
>Pde6a_sgRNA3	AGGAGCTCACGGATATAGAG	Retinal disease gene (POSITIVE CONTROL)
>Pde6a_sgRNA4	GGATGTGGTAGCCATAATCA	Retinal disease gene (POSITIVE CONTROL)
>Pde6a_sgRNA5	TATGGACGAGACCCTCATGG	Retinal disease gene (POSITIVE CONTROL)
>Pde6a_sgRNA6	TTCATGTATTCGCTAAGCAA	Retinal disease gene (POSITIVE CONTROL)
>Pde6a_sgRNA7	TCATGCGGTCAGCCCGCAGG	Retinal disease gene (POSITIVE CONTROL)
>Pde6a_sgRNA8	TTGGGAACAGAAAACCAGAG	Retinal disease gene (POSITIVE CONTROL)
>Pde6a_sgRNA9	CCCACGACACCCATGTCCAG	Retinal disease gene (POSITIVE CONTROL)
>Pde6a_sgRNA10	GTGGTAGTTGCTGAAGTCCA	Retinal disease gene (POSITIVE CONTROL)
>Pde6b_sgRNA1	GCATAGCTGAACTTGCTACG	Retinal disease gene (POSITIVE CONTROL)
>Pde6b_sgRNA2	ACACCTTATTGGCTGACCAG	Retinal disease gene (POSITIVE CONTROL)
>Pde6b_sgRNA3	AAGACGATCTCAGAGTCAGG	Retinal disease gene (POSITIVE CONTROL)
>Pde6b_sgRNA4	GTCATCGATTATATCCTCCA	Retinal disease gene (POSITIVE CONTROL)
>Pde6b_sgRNA5	CCTGCGAGAGCTGTGCCAGG	Retinal disease gene (POSITIVE CONTROL)
>Pde6b_sgRNA6	CAAGAAGATGATAAACGTGC	Retinal disease gene (POSITIVE CONTROL)
>Pde6b_sgRNA7	GAGCTGGAGCTAGTCAAATG	Retinal disease gene (POSITIVE CONTROL)
>Pde6b_sgRNA8	GAACCGTAAGGACATCGCCC	Retinal disease gene (POSITIVE CONTROL)
>Pde6b_sgRNA9	ACAAGAAAGAGGAGATTGTG	Retinal disease gene (POSITIVE CONTROL)
>Pde6b_sgRNA10	ATGGCAGTGAATAAACTGGA	Retinal disease gene (POSITIVE CONTROL)
>Prpf8_sgRNA1	TAAACCGGCTCGATAACCCA	Retinal disease gene (POSITIVE CONTROL)
>Prpf8_sgRNA2	ATGGTTCCACCTACCAACGC	Retinal disease gene (POSITIVE CONTROL)
>Prpf8_sgRNA3	AAAGAACGGAACAGATACCT	Retinal disease gene (POSITIVE CONTROL)
>Prpf8_sgRNA4	TCAATGAACTCGCTCTCCCA	Retinal disease gene (POSITIVE CONTROL)
>Prpf8_sgRNA5	TCTAGGCCGTCACTCAAAGG	Retinal disease gene (POSITIVE CONTROL)
>Prpf8_sgRNA6	TGTACTGTAGTCACCGATCG	Retinal disease gene (POSITIVE CONTROL)
>Prpf8_sgRNA7	TCGCAGCAGCCTGTTAAGCA	Retinal disease gene (POSITIVE CONTROL)
>Prpf8_sgRNA8	ACTCAGTACGAATAGGCTGA	Retinal disease gene (POSITIVE CONTROL)
>Prpf8_sgRNA9	TGGGCCTTACATCACAGCCG	Retinal disease gene (POSITIVE CONTROL)
>Prpf8_sgRNA10	CCAGAACAGACCCTCCCAGG	Retinal disease gene (POSITIVE CONTROL)
>Rho_sgRNA1	AGTACTACCTGGCGGAACCA	Retinal disease gene (POSITIVE CONTROL)
>Rho_sgRNA2	TACCTGGACCAGCCAACGAG	Retinal disease gene (POSITIVE CONTROL)
>Rho_sgRNA3	TCTGCTCATACCTCCAAGTG	Retinal disease gene (POSITIVE CONTROL)
>Rho_sgRNA4	GTACGGTGACGTAGAGCGTG	Retinal disease gene (POSITIVE CONTROL)
>Rho_sgRNA5	CTGGACCAGCCAACGAGTGG	Retinal disease gene (POSITIVE CONTROL)
>Rho_sgRNA6	GGCCATTGAGCGCTACGTGG	Retinal disease gene (POSITIVE CONTROL)
>Rho_sgRNA7	ACCCTCTACACATCACTCCA	Retinal disease gene (POSITIVE CONTROL)
>Rho_sgRNA8	CTACTACACACTCAAGCCTG	Retinal disease gene (POSITIVE CONTROL)
>Rho_sgRNA9	GAAGATGACGATCATAGGAA	Retinal disease gene (POSITIVE CONTROL)
>Rho_sgRNA10	CATCCTGCTCAACTTGGCCG	Retinal disease gene (POSITIVE CONTROL)
>Ttc21b_sgRNA1	TGTTCATGTACGCATCGCCG	Retinal disease gene (POSITIVE CONTROL)
>Ttc21b_sgRNA2	GCTTCAAGACAATCACAACG	Retinal disease gene (POSITIVE CONTROL)
>Ttc21b_sgRNA3	GCTCTCATTCAGCGTCATGG	Retinal disease gene (POSITIVE CONTROL)
>Ttc21b_sgRNA4	TAGATACTGTACCTGGATTG	Retinal disease gene (POSITIVE CONTROL)
>Ttc21b_sgRNA5	GTCACCTCATTGCTATCATG	Retinal disease gene (POSITIVE CONTROL)
>Ttc21b_sgRNA6	CCTGTTCTCCATTTAAGCGG	Retinal disease gene (POSITIVE CONTROL)
>Ttc21b_sgRNA7	TCCCTCCTCAAAATACCGCA	Retinal disease gene (POSITIVE CONTROL)
>Ttc21b_sgRNA8	GCTCATGAGCTAGAGAGTGC	Retinal disease gene (POSITIVE CONTROL)
>Ttc21b_sgRNA9	GGTGAGCCTCCGCATAGGAG	Retinal disease gene (POSITIVE CONTROL)
>Ttc21b_sgRNA10	CACTTGGAAGACCTCCCGCT	Retinal disease gene (POSITIVE CONTROL)
>NT_A1	GTGCCTATTGCTACTAAAAA	Untargeting gRNA (NEGATIVE CONTROL)
>NT_A2	TAATACTACCTACTAGCCAA	Untargeting gRNA (NEGATIVE CONTROL)
>NT_A3	TCTTGCTAGAAAAACAAAGC	Untargeting gRNA (NEGATIVE CONTROL)
>NT_A4	ATTCGATTCATGTAGTTGCC	Untargeting gRNA (NEGATIVE CONTROL)
>NT_A5	TAAATAGTAGGTTCATGTGA	Untargeting gRNA (NEGATIVE CONTROL)
>NT_A6	AATGCCTTGCTTATTATGGA	Untargeting gRNA (NEGATIVE CONTROL)
>NT_A7	TTCGATTTCAGCCATACATT	Untargeting gRNA (NEGATIVE CONTROL)
>NT_A8	CCATAAACGGCGCCTATCTA	Untargeting gRNA (NEGATIVE CONTROL)
>NT_A9	GGATTGTTTCTGCTTACCTA	Untargeting gRNA (NEGATIVE CONTROL)
>NT_A10	TGGACGTAGTTAAGGACTAT	Untargeting gRNA (NEGATIVE CONTROL)
>NT_A11	ACGCAATGGTTTCTATAAGG	Untargeting gRNA (NEGATIVE CONTROL)
>NT_A12	TGTCGCCCGGGAGACACTTT	Untargeting gRNA (NEGATIVE CONTROL)
>NT_A13	TTCCAGGCTTCCGGCATTGA	Untargeting gRNA (NEGATIVE CONTROL)
>NT_A14	GGACGTCTACAGTCGCCAGT	Untargeting gRNA (NEGATIVE CONTROL)
>NT_A15	AGTACTATTGCTATTCACTT	Untargeting gRNA (NEGATIVE CONTROL)
>NT_A16	TGACGTGTTAGCTGATTGAT	Untargeting gRNA (NEGATIVE CONTROL)
>NT_A17	TAAAGATGCCCAGAAATGTA	Untargeting gRNA (NEGATIVE CONTROL)
>NT_A18	CTGAACTCCCTAGAGAAATA	Untargeting gRNA (NEGATIVE CONTROL)
>NT_A19	GACCTGAATAACTGCATATC	Untargeting gRNA (NEGATIVE CONTROL)
>NT_A20	ATATTGGGTCTATCATCGTA	Untargeting gRNA (NEGATIVE CONTROL)
>NT_A21	CCAATTCGGTACTTGCTGTA	Untargeting gRNA (NEGATIVE CONTROL)
>NT_A22	CCATGCCAAGACTATCGTTC	Untargeting gRNA (NEGATIVE CONTROL)
>NT_A23	ATAGAAGCGCTGCAACCTCG	Untargeting gRNA (NEGATIVE CONTROL)
>NT_A24	TTCCTCGGTCACGGTAAAAA	Untargeting gRNA (NEGATIVE CONTROL)
>NT_A25	ATGTCAGTCCGCTGAGCGGT	Untargeting gRNA (NEGATIVE CONTROL)
>NT_A26	GGATATTATTTATTAAGTCG	Untargeting gRNA (NEGATIVE CONTROL)
>NT_B1	GCTAAGGCTATGTGGGATCT	Untargeting gRNA (NEGATIVE CONTROL)
>NT_B3	CTTGATCCAGGCTGTCAACC	Untargeting gRNA (NEGATIVE CONTROL)
>NT_B4	GAGAGCATGCCAACATGAAC	Untargeting gRNA (NEGATIVE CONTROL)
>NT_B5	TAGGTTAGTACATCTTCGTA	Untargeting gRNA (NEGATIVE CONTROL)
>NT_B6	GGATTTAAAATGCGGTGGTA	Untargeting gRNA (NEGATIVE CONTROL)
>NT_B7	TTAGCGCACTTCATACCTGC	Untargeting gRNA (NEGATIVE CONTROL)
>NT_B8	AATCCACGACGATCGTGAAC	Untargeting gRNA (NEGATIVE CONTROL)
>NT_B9	AACGTTACTCAAATGGCACC	Untargeting gRNA (NEGATIVE CONTROL)
>NT_B10	AGTATAACTGGTTGCCCCCT	Untargeting gRNA (NEGATIVE CONTROL)
>NT_B11	ACAGCTGCAAAGATTTACAT	Untargeting gRNA (NEGATIVE CONTROL)
>NT_B12	TTCGTCCATTGCATTTAACA	Untargeting gRNA (NEGATIVE CONTROL)
>NT_B13	ATCTGTCATCATGCTTCTAG	Untargeting gRNA (NEGATIVE CONTROL)
>NT_B14	AATTAACTTGAAGCGCCGAC	Untargeting gRNA (NEGATIVE CONTROL)
>NT_B15	CGATTCTTTTAGGTGCTCTT	Untargeting gRNA (NEGATIVE CONTROL)
>NT_B16	CATACCGGTTAGCTAAGTAT	Untargeting gRNA (NEGATIVE CONTROL)
>NT_B17	CTCAACGAGCACTATACACC	Untargeting gRNA (NEGATIVE CONTROL)
>NT_B18	CACATACATGGTAGAAATTT	Untargeting gRNA (NEGATIVE CONTROL)
>NT_B19	TGGTAATTGAATAGGGTTGT	Untargeting gRNA (NEGATIVE CONTROL)
>NT_B21	CTCTGATGCAGTTATTTGAA	Untargeting gRNA (NEGATIVE CONTROL)
>NT_B22	CATAATTGGGACTGACATTA	Untargeting gRNA (NEGATIVE CONTROL)
>NT_B23	CAGATGCCTTGGAAAGTTTA	Untargeting gRNA (NEGATIVE CONTROL)
>NT_B24	ACGGAACGCCACGACTAAGG	Untargeting gRNA (NEGATIVE CONTROL)
>NT_B25	GTGCCACTACCCCTATTCTG	Untargeting gRNA (NEGATIVE CONTROL)
>NT_B26	TTCATCAAAATCCTCAGTGT	Untargeting gRNA (NEGATIVE CONTROL)
>NT_C1	AAACAAATTGGCGTGTAAGT	Untargeting gRNA (NEGATIVE CONTROL)
>NT_C2	CGGTAGGTCACATCTCTAAA	Untargeting gRNA (NEGATIVE CONTROL)
>NT_C3	GTCCAACAGAAGATCCCCAA	Untargeting gRNA (NEGATIVE CONTROL)
>NT_C4	ATGGGGAGCGCCACAAAAAC	Untargeting gRNA (NEGATIVE CONTROL)
>NT_C5	CATAAATTGTCAGCGCGAAT	Untargeting gRNA (NEGATIVE CONTROL)
>NT_C6	ATAGATGTAAACCCAGACTA	Untargeting gRNA (NEGATIVE CONTROL)
>NT_C7	AGTAAAGGAAATAGTATTTG	Untargeting gRNA (NEGATIVE CONTROL)
>NT_C8	ATTTCTCAAACAAACGATAT	Untargeting gRNA (NEGATIVE CONTROL)
>NT_C9	CACTTGTAATGCTGACGAGG	Untargeting gRNA (NEGATIVE CONTROL)
>NT_C10	CGCTTATATTACTTGGTATA	Untargeting gRNA (NEGATIVE CONTROL)
>NT_C11	CATCGATCTCAAATAGAACA	Untargeting gRNA (NEGATIVE CONTROL)
>NT_C13	AGTATTTAACATGTGAGAAA	Untargeting gRNA (NEGATIVE CONTROL)
>NT_C14	TGGAAATCTCAAGTCTCAGT	Untargeting gRNA (NEGATIVE CONTROL)
>NT_C15	ACTATAAAGTTATCTGTACA	Untargeting gRNA (NEGATIVE CONTROL)
>NT_C16	CAATCGTAGACTACTCTAAT	Untargeting gRNA (NEGATIVE CONTROL)
>NT_C17	CTGCTTGTGGCGAACAGGAA	Untargeting gRNA (NEGATIVE CONTROL)
>NT_C18	CCGGAAACATCTTAGTACTG	Untargeting gRNA (NEGATIVE CONTROL)
>NT_C20	GTGCGGATAATCGTACGGAA	Untargeting gRNA (NEGATIVE CONTROL)
>NT_C21	CTGTTAGAAGGGAGCGCTTA	Untargeting gRNA (NEGATIVE CONTROL)
>NT_C22	TGAAATCTAACGGCCGGGAT	Untargeting gRNA (NEGATIVE CONTROL)
>NT_C23	CTGTAGGCTTTCACAAGGGC	Untargeting gRNA (NEGATIVE CONTROL)
>NT_C24	AATTAGTGGCAACTGCGTCC	Untargeting gRNA (NEGATIVE CONTROL)
>NT_C25	CCTAGGTACAGGTCCTCCAG	Untargeting gRNA (NEGATIVE CONTROL)
>NT_C26	GAGCCCCGTTTTAGGACGAT	Untargeting gRNA (NEGATIVE CONTROL)
>NT_D1	TTATTTATTTTTGAGGGTTA	Untargeting gRNA (NEGATIVE CONTROL)
>NT_D2	TGGTGAACCTGACCACGGAT	Untargeting gRNA (NEGATIVE CONTROL)
>NT_D3	TTATCGTGCTCCAGCTCGGG	Untargeting gRNA (NEGATIVE CONTROL)
>NT_D4	ACGTACGCATGTTCTCGGTA	Untargeting gRNA (NEGATIVE CONTROL)
>NT_D5	CACGTATAGTGTCGAGGCTC	Untargeting gRNA (NEGATIVE CONTROL)
>NT_D6	TGTCCAATTTCAACAGTAAT	Untargeting gRNA (NEGATIVE CONTROL)
>NT_D7	AATCTATGTGCGGATAGGAA	Untargeting gRNA (NEGATIVE CONTROL)
>NT_D8	CTCCCAACGCGTGACCCTGT	Untargeting gRNA (NEGATIVE CONTROL)
>NT_D9	CGTTGCTTTCGCTAAATACG	Untargeting gRNA (NEGATIVE CONTROL)
>NT_D10	ATACTTTACACAGAACGCAG	Untargeting gRNA (NEGATIVE CONTROL)
>NT_D11	ATCGAACAACGGACGCCGGT	Untargeting gRNA (NEGATIVE CONTROL)
>NT_D12	TCCTACTTCTAAAATTAGCT	Untargeting gRNA (NEGATIVE CONTROL)
>NT_D13	TTAATCTTAATACGATATTT	Untargeting gRNA (NEGATIVE CONTROL)
>NT_D14	TTCAAATATTAAACAGCAAA	Untargeting gRNA (NEGATIVE CONTROL)
>NT_D15	TTACATATGAAAAGCTCGTT	Untargeting gRNA (NEGATIVE CONTROL)
>NT_D16	CTTCCCAGCGTGAGGGTCTT	Untargeting gRNA (NEGATIVE CONTROL)
>NT_D17	AAGTTTAGGGGACAGGAAAA	Untargeting gRNA (NEGATIVE CONTROL)
>NT_D18	CATTAAATAGTGACCTTCAT	Untargeting gRNA (NEGATIVE CONTROL)
>NT_D19	AGTACCCTTGTGATGGCTGT	Untargeting gRNA (NEGATIVE CONTROL)
>NT_D20	AGGATTATACCCTTTGTGAA	Untargeting gRNA (NEGATIVE CONTROL)
>NT_D21	ACGGATTTCATGTGAGTTTA	Untargeting gRNA (NEGATIVE CONTROL)
>NT_D22	GAATCCAAGTAATAATACTG	Untargeting gRNA (NEGATIVE CONTROL)
>NT_D23	GAGAAGTAAACCCACGTATA	Untargeting gRNA (NEGATIVE CONTROL)
>NT_D24	CTTATGCCATTGGCTACTGA	Untargeting gRNA (NEGATIVE CONTROL)
>NT_D25	ACAGCTTAATCATTAACGCA	Untargeting gRNA (NEGATIVE CONTROL)
>NT_D26	ACACCTACAAGCAGTTGAAT	Untargeting gRNA (NEGATIVE CONTROL)
Supplemental Table 1: gRNA sequences contained in the validation library.
